# Supplementary material
Source: publisher figshare collection journal article supplement (https://acs.figshare.com/ndownloader/files/17412686)
Supplement: Supplementary file 1 [file 17412686]

## Supporting information

### **Structural and Mutagenesis Studies Evince the Role of the Extended Protuberant Domain of Ribosomal Protein uL10 in Protein Translation**

Kwok-Ho Andrew Choi,<sup>†</sup> Lei Yang,<sup>†</sup> Ka-Ming Lee,<sup>†</sup> Conny Wing-Heng Yu,<sup>†</sup> David K. Banfield,<sup>‡</sup> Kosuke Ito,<sup>§</sup> Toshio Uchiumi,<sup>§</sup> and Kam-Bo Wong <sup>\*,†</sup>

<sup>†</sup>School of Life Sciences, Centre for Protein Science and Crystallography, State Key Laboratory of Agrobiotechnology, The Chinese University of Hong Kong, Shatin, Hong Kong, China

<sup>‡</sup> Division of Life Science, Hong Kong University of Science and Technology, Clear Water Bay, Hong Kong, China

<sup>§</sup> Department of Biology, Faculty of Science, Niigata University, Ikarashi 2-8050, Nishi-ku, Niigata 950-2191, Japan



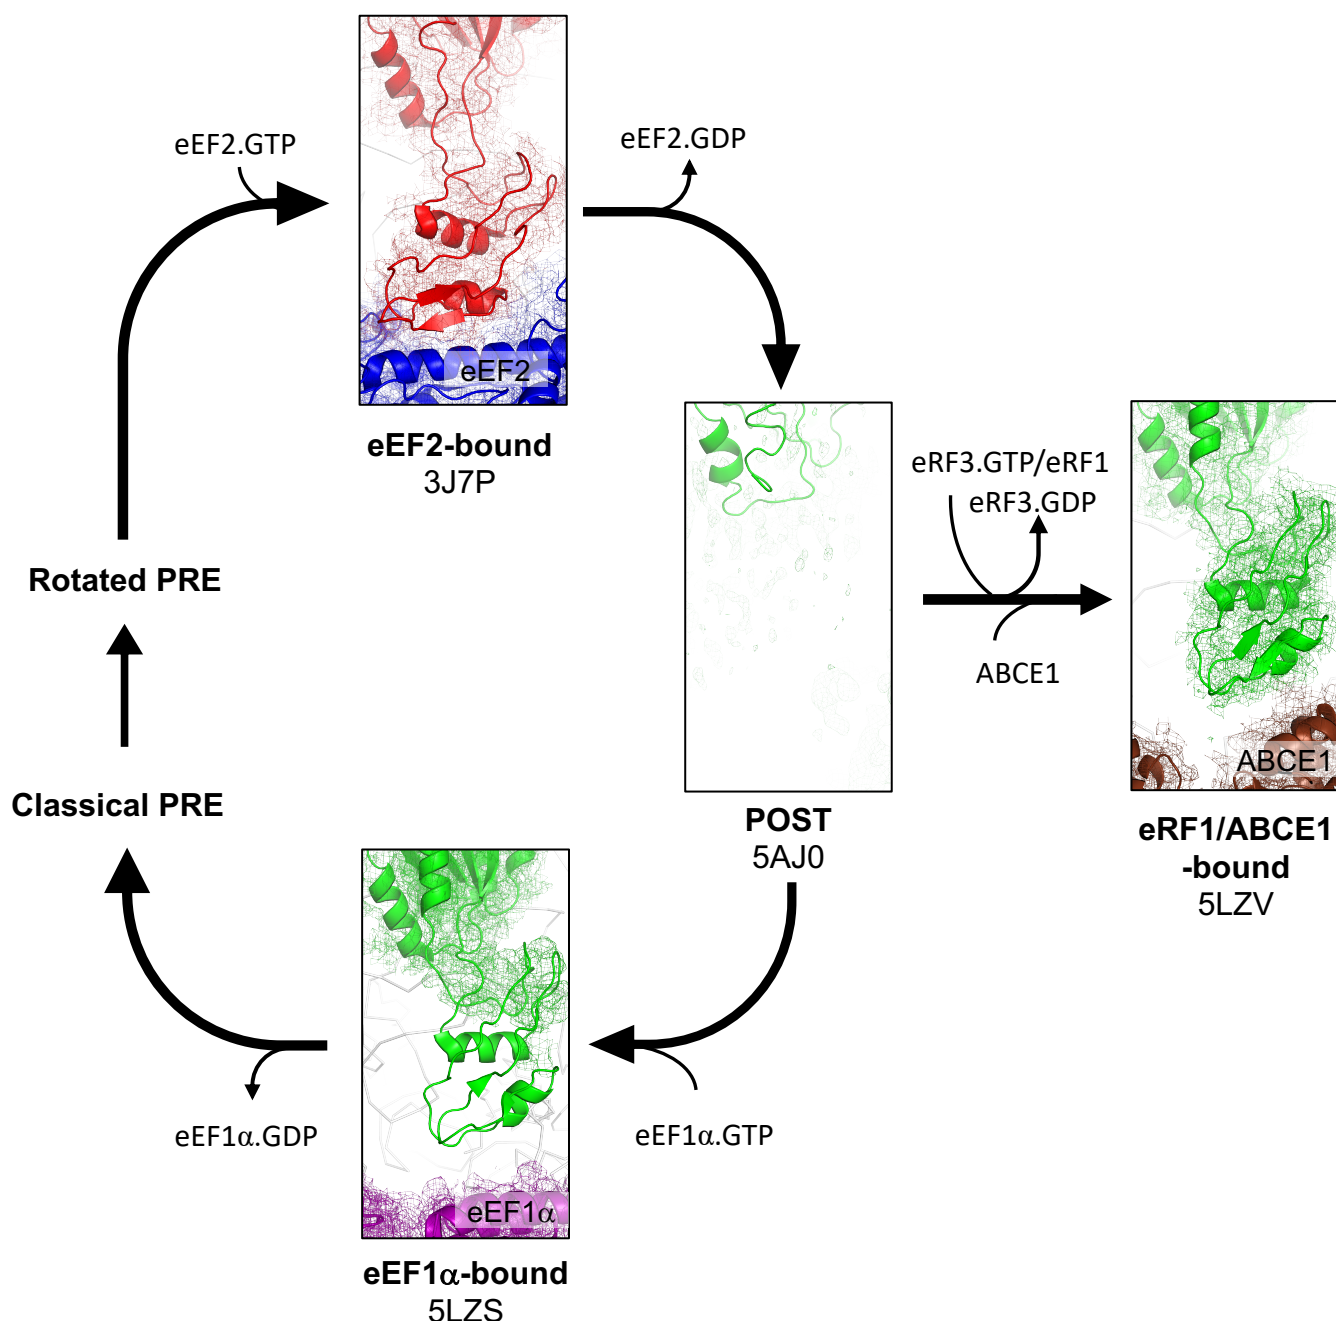

**Figure S2.** Structures of the uL10ext domain in various states of eukaryotic ribosomes. The classification of various states in the elongation cycle is described by Behrmann and co-workers<sup>70</sup>. Cryo-EM densities for the uL10ext domain and the surrounding area are shown with the fitted models. Structures of the eEF2-bound (PDB accession code: 3J7P<sup>65</sup>), eRF1/ABCE1-bound (PDB accession code: 5LZV<sup>64</sup>), eEF1α-bound (PDB accession code: 5LZS<sup>64</sup>) and post-translocation state (POST) (PDB accession code: 5AJ0<sup>70</sup>) of ribosomes were shown. The uL10ext domain is defined only in the eEF2-bound and eRF1/ABCE1-bound ribosomes.

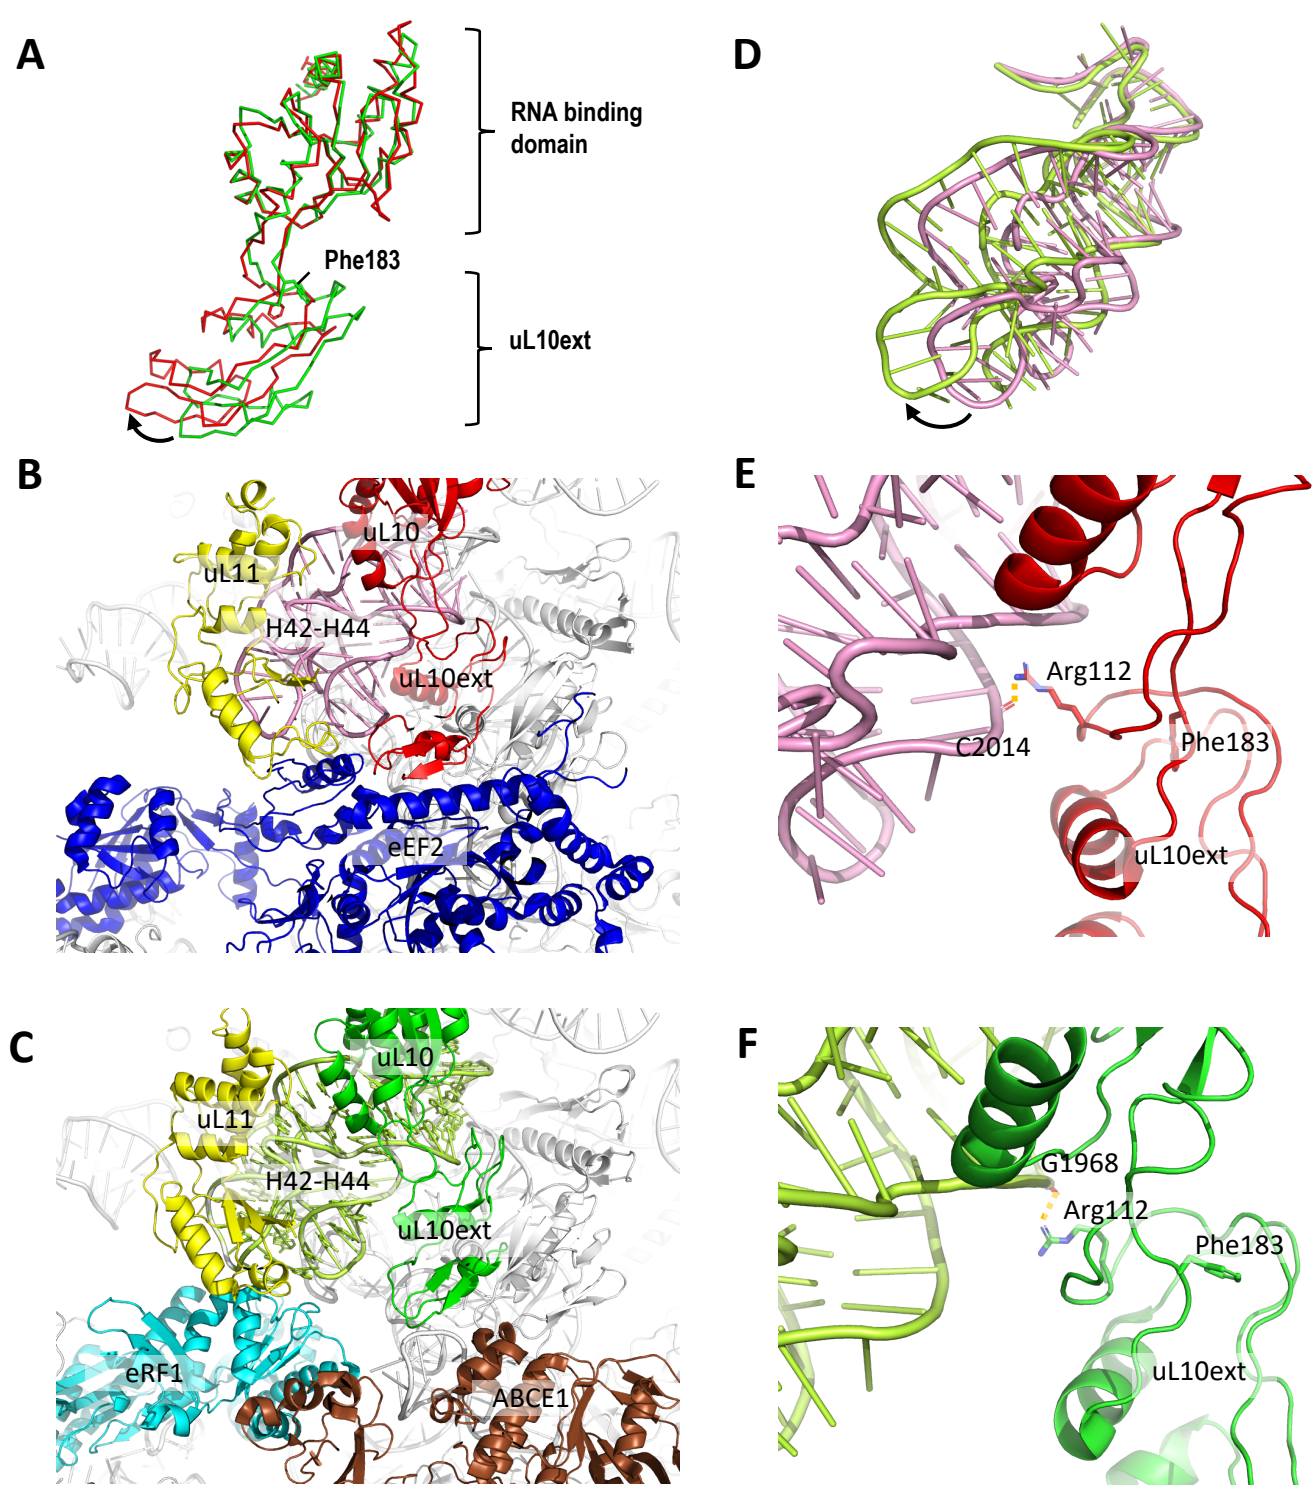

**Figure S3.** Structural changes in the stalk base of eukaryotic ribosomes. **(A)** The structure of uL10 from eRF1/ABCE1-bound ribosomes (green) was superimposed with that from the eEF2-bound ribosomes (red) based on residues in the RNA-binding domain. As denoted by an arrow, the uL10ext domain in the eRF1/ABCE1-bound ribosomes exhibits a rigid-body hinging motion relative to the RNA-binding domain. **(B)** The conformation of the stalk base in the eEF2-bound ribosome. Both the uL10ext domain (red) and uL11 (yellow) make extensive contacts with the bound eEF2 (blue). **(C)** The conformation of the stalk base in the eRF1/ABCE1-bound ribosomes. **(D)** Interactions between uL11 and eRF1 induce the rRNA stem loop H42-H44 move towards the eRF1 binding site in eRF1/ABCE1-bound ribosomes (light green) as compared to the eEF2-bound ribosomes (pink). **(E)** In the eEF2-bound ribosomes, Arg112 from the uL10ext domain forms a salt bridge with C2014 of rRNA. **(F)** In the eRF1/ABCE1-bound ribosomes, the conserved arginine residue moves to a new position and forms a salt bridge with G1968 of rRNA (light green), inducing the rigid-body hinging motion of the uL10ext domain (green).



Eukaryotic 80S ribosome

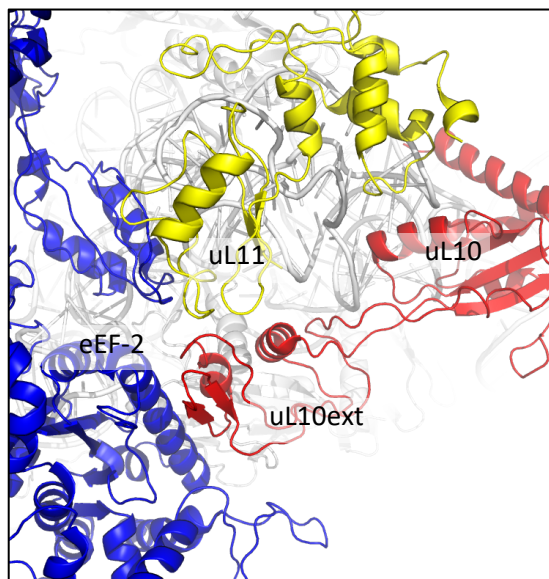

Bacterial 70S ribosome

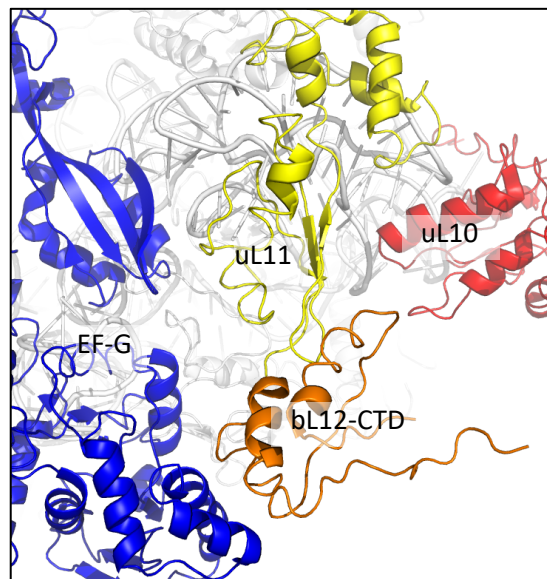

**Figure S4.** Structural comparison of the stalk base of the eEF2-bound eukaryotic ribosomes (PDB accession code: 3J7P <sup>65</sup>) and the EF-G-bound bacterial ribosomes (PDB accession code: 4V5F <sup>80</sup>). The uL10ext domain occupies a location that is similar to that occupied by the C-terminal domain (CTD) of bL12.
